# Supplementary material for: CeO2 stabilized by tourmaline as a novel inorganic filler to simultaneously increase the conductivity and durability of proton exchange membranes
Source: Royal Society of Chemistry journal article supplement (doi:10.1039/d3qi00450c), 2023-01-01
Supplement: d3qi00450c1.pdf [file d3qi00450c1.pdf]

## CeO<sub>2</sub> stabilized by tourmaline as a novel inorganic filler to simultaneously increase the conductivity and durability of proton exchange membranes

### contents

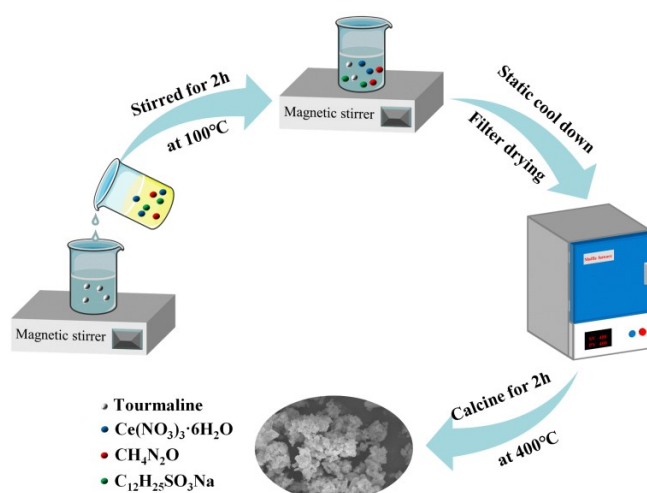

Scheme S1. The synthetic process of Tourmaline-CeO<sub>2</sub>.

Table S1. IEC, hydration number at 80°C of membranes.

| Samples                           | IEC (mmol/g) | H <sub>80</sub> (n(H <sub>2</sub> O)/n(SO <sub>3</sub> <sup>-</sup> )) |
|-----------------------------------|--------------|------------------------------------------------------------------------|
| Pristine PFSA                     | 1.050        | 13.889                                                                 |
| PFSA/TM-CeO <sub>2</sub> (0.5wt%) | 1.037        | 15.107                                                                 |
| PFSA/TM-CeO <sub>2</sub> (1wt%)   | 1.021        | 17.401                                                                 |
| PFSA/TM-CeO <sub>2</sub> (1.5wt%) | 1.029        | 18.492                                                                 |
| PFSA/TM-CeO <sub>2</sub> (2wt%)   | 0.984        | 20.562                                                                 |

Table S2. Comparison of proton conductivity and fuel cell performance for pristine  
 PFSA and PFSA/TM-CeO<sub>2</sub> (1wt%) composite membranes.

| Samples                         | Proton conductivity<br>(mS cm <sup>-1</sup> ) | Power density<br>(mW cm <sup>-2</sup> ) | OCV degradation rates<br>(mV/h) |
|---------------------------------|-----------------------------------------------|-----------------------------------------|---------------------------------|
| Pristine PFSA                   | 143.91                                        | 906                                     | 2.18                            |
| PFSA/TM-CeO <sub>2</sub> (1wt%) | 155.51                                        | 1006                                    | 0.29                            |

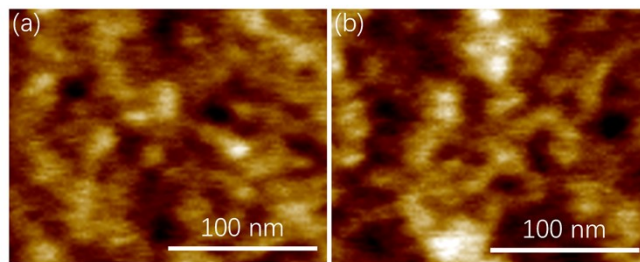

Fig. S1. AFM images of (a) pristine PFSA and (b) PFSA/TM-CeO<sub>2</sub> (1wt%).

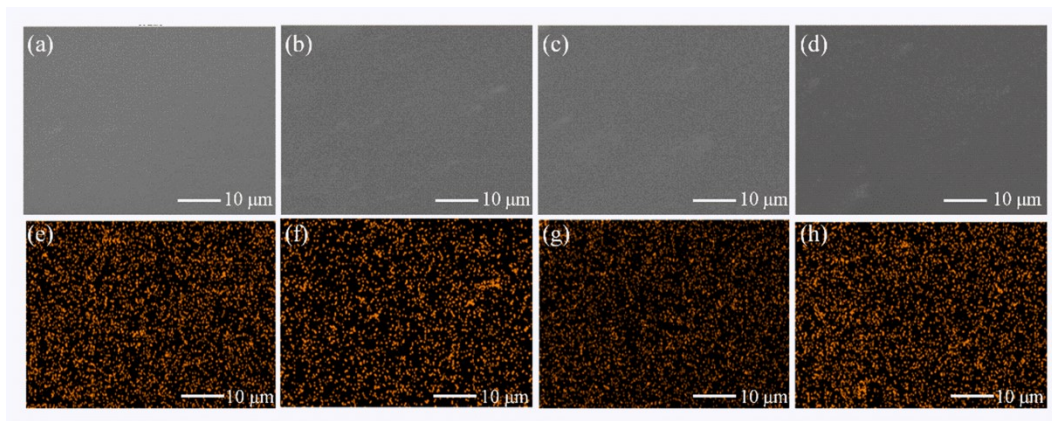

Fig. S2. Surface SEM-EDS mappings of Ce element distribution for the various composite membranes. (a, e) PFSA/TM-CeO<sub>2</sub> (0.5wt%); (b, f) PFSA/TM-CeO<sub>2</sub> (1wt%); (c, g) PFSA/TM-CeO<sub>2</sub> (1.5wt%); (d, h) PFSA/TM-CeO<sub>2</sub> (2wt%).

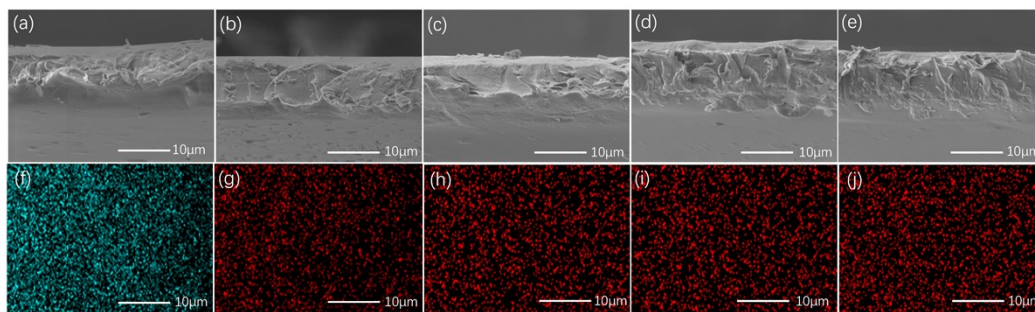

Fig. S3. Cross SEM-EDS mappings of O or Ce element distribution for the various composite membranes. (a, f) pristine PFSA; (b, g) PFSA/TM-CeO<sub>2</sub> (0.5wt%); (c, h) PFSA/TM-CeO<sub>2</sub> (1wt%); (d, i) PFSA/TM-CeO<sub>2</sub> (1.5wt%); (e, j) PFSA/TM-CeO<sub>2</sub> (2wt%).

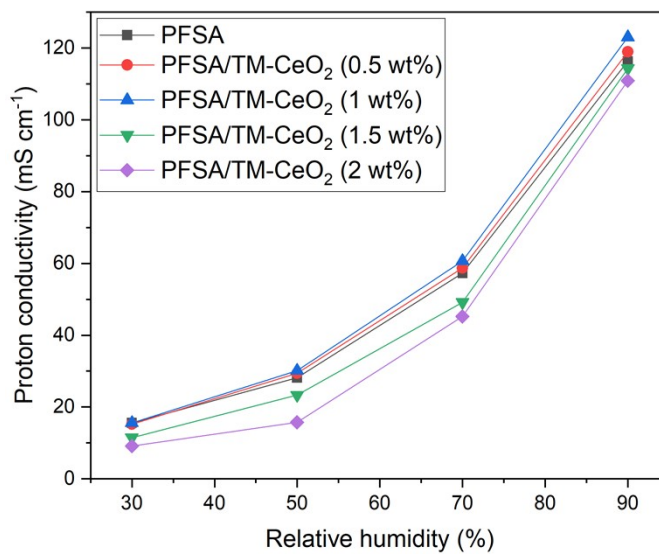

Fig. S4. HFR of Proton conductivity of pristine PFSA and various PFSA/TM-CeO<sub>2</sub> (X wt%) composite membranes at different relative humidity under 80°C.

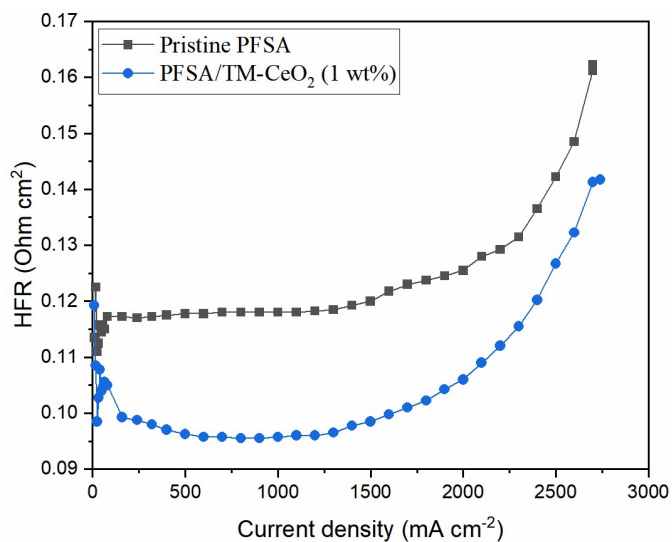

Fig. S5. HFR of MEAs corresponding to pristine PFSA, PFSA/TM-CeO<sub>2</sub> (1wt%) composite membranes.

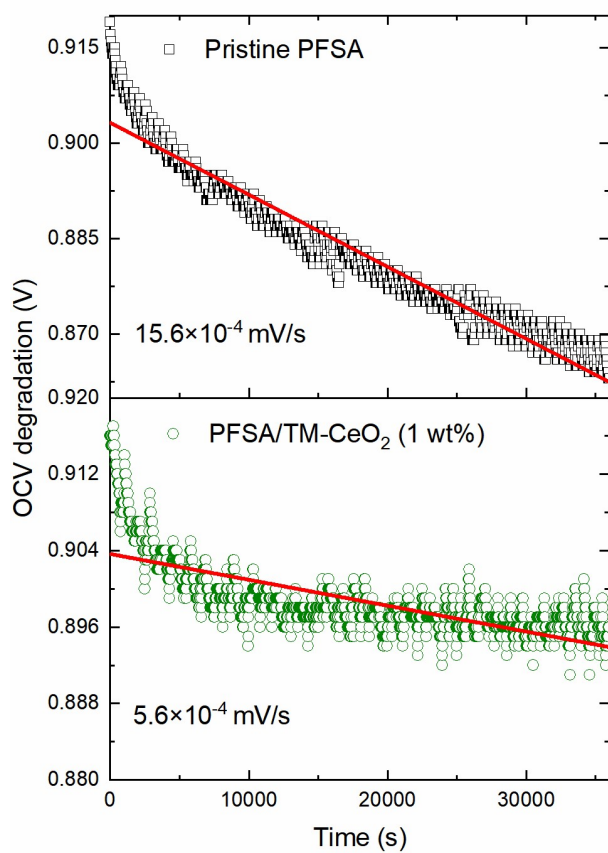

Fig. S6. Durability curves of pristine PFSA and PFSA/TM-CeO<sub>2</sub> (1wt%) membranes at 90°C and 30% RH.

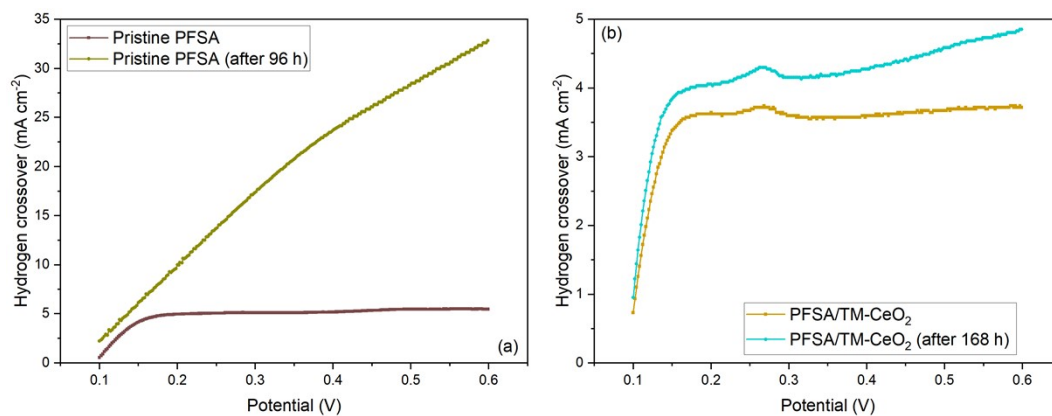

Fig. S7. Hydrogen crossover of the pristine PFSA, PFSA/TM-CeO<sub>2</sub> (1wt%) composite membranes before and after OCV.
